# Supplementary material for: Perioperative administration of propranolol to women undergoing ovarian cancer surgery: A pilot study
Source: PubMed Central journal article supplement — Obstet Gynecol Sci. 2017 Mar 16;60(2):170–7. doi: 10.5468/ogs.2017.60.2.170 (PMC5364099; doi:10.5468/ogs.2017.60.2.170), 2017-03-16
Supplement: ogs-60-170-s001.pdf [file ogs-60-170-s001.pdf]

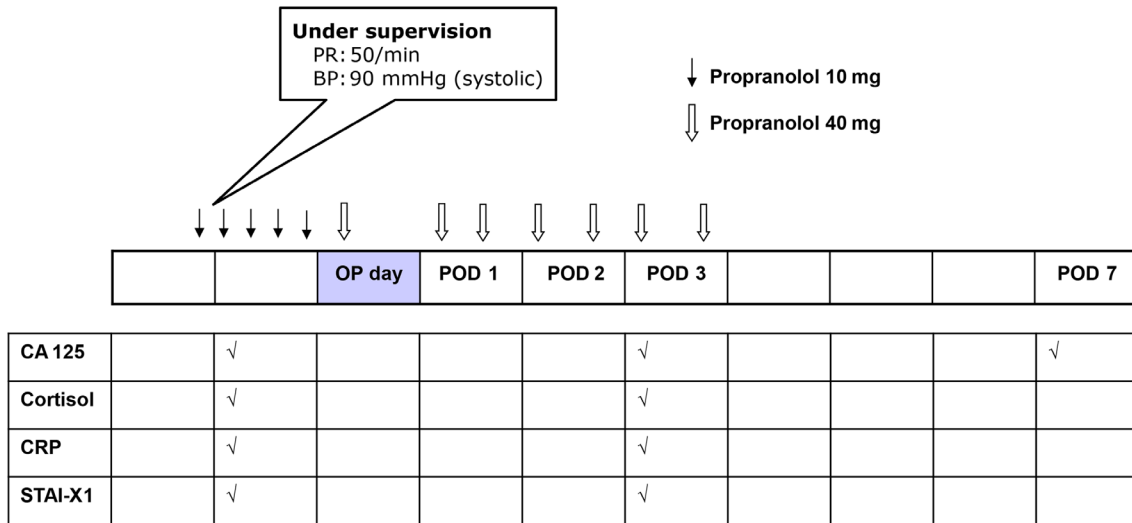

**Supplemental Fig. 1.** Schedule of propranolol administration and outcome measure. PR, pulse rate; BP, blood pressure; OP, operation; POD, postoperative day; CRP, C-reactive protein; STAI-X1, State-Trait Anxiety Inventory-X1.
