# Supplementary figures and images for: Perioperative administration of propranolol to women undergoing ovarian cancer surgery: A pilot study
Source: PubMed Central journal article supplement — Obstet Gynecol Sci. 2017 Mar 16;60(2):170–7. doi: 10.5468/ogs.2017.60.2.170 (PMC5364099; doi:10.5468/ogs.2017.60.2.170), 2017-03-16

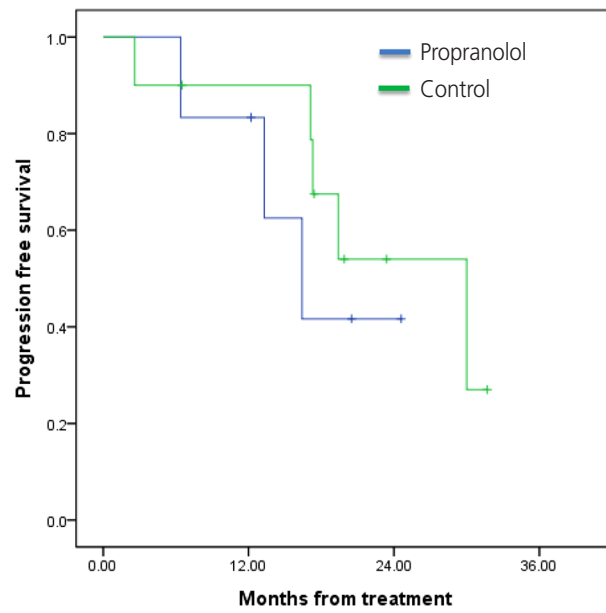

**Supplemental Fig. 2.** Kaplan-Meier curve of disease-free survival.

Supplement: ogs-60-170-s002.pdf [file ogs-60-170-s002.pdf]
